# Supplementary material for: Assessment of North American Clinical Research Site Performance During the Start-up of Large Cardiovascular Clinical Trials
Source: PubMed Central journal article supplement (PMC9435961; doi:10.1001/jamanetworkopen.2021.17963), 2021-07-23
Supplement: jamanetwopen-e2117963-s001.pdf [file jamanetwopen-e2117963-s001.pdf]

## Supplementary Online Content

Goyal A, Schibler T, Alhanti B, et al. Assessment of North American clinical research site performance during the start-up of large cardiovascular clinical trials. *JAMA Netw Open*. 2021;4(7):e2117963. doi:10.1001/jamanetworkopen.2021.17963

**eFigure 1.** Regulatory Approval Time by Trial

**eFigure 2.** Contract Execution Time by Trial

**eFigure 3.** Activation Time by Trial

**eFigure 4.** Enrollment of First Participant Time by Trial

**eFigure 5.** Overall Start-Up Time by Trial

**eFigure 6.** Side-by-Side Boxplots of Regulatory Approval and Contract Execution by 2004-2007 vs 2008-2012 Trials

**eFigure 7.** Side-by-Side Boxplots of Regulatory Approval and Contract Execution by Trial

**eTable 1.** Milestone Pacing Site Activation

**eTable 2.** Milestone Pacing to Site Activation for Individual Trials

**eTable 3.** Time to Regulatory Approval for Individual Trials by IRB Type

**eTable 4.** Time to Overall Start-Up for Individual Trials by IRB Type

This supplementary material has been provided by the authors to give readers additional information about their work.

**eFigure 1. Regulatory Approval Time by Trial**

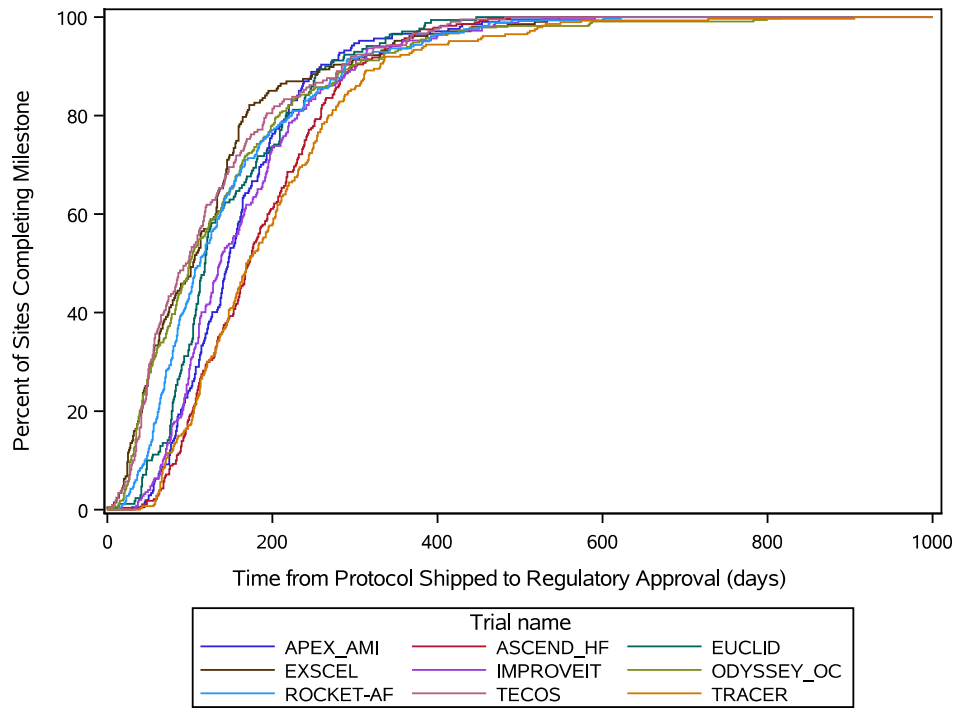

Caption: The time to regulatory approval for each trial represented by the percent of sites completing the milestone at a given time in days.

## eFigure 2. Contract Execution Time by Trial

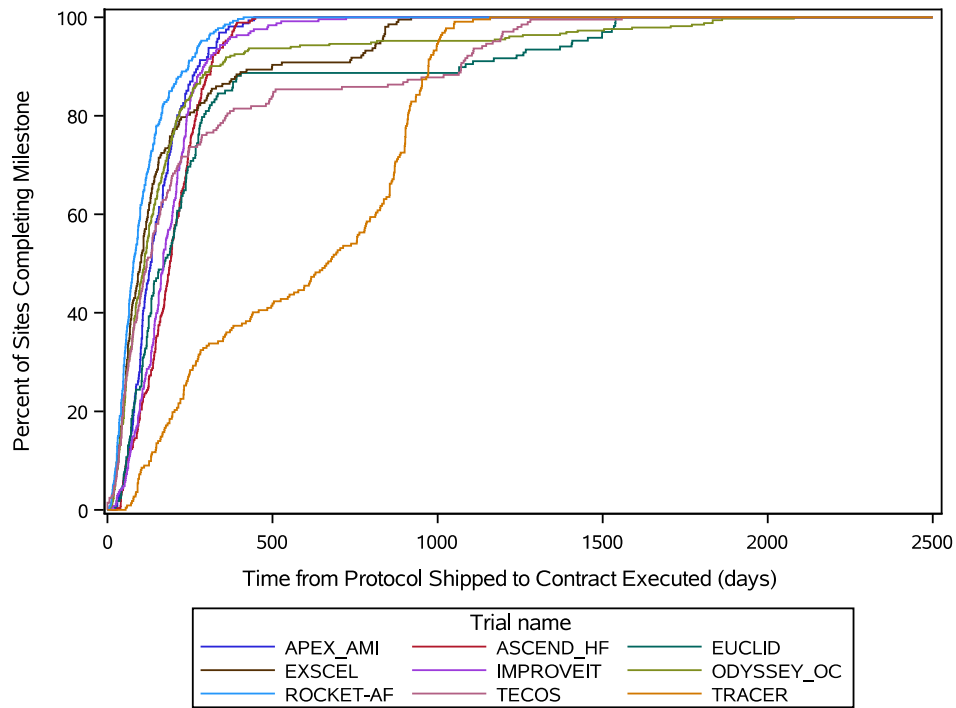

Caption: The time to contract execution for each trial represented by the percent of sites completing the milestone at a given time in days.

### eFigure 3. Activation Time by Trial

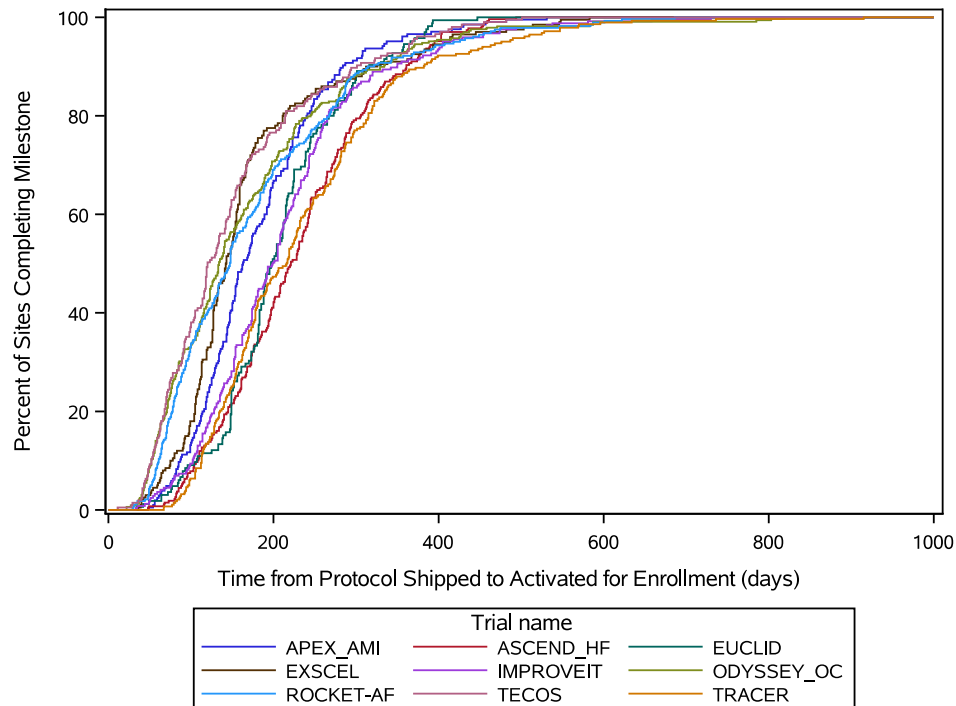

Caption: The activation time for each trial represented by the percent of sites completing the milestone at a given time in days.

**eFigure 4. Enrollment of First Participant Time by Trial**

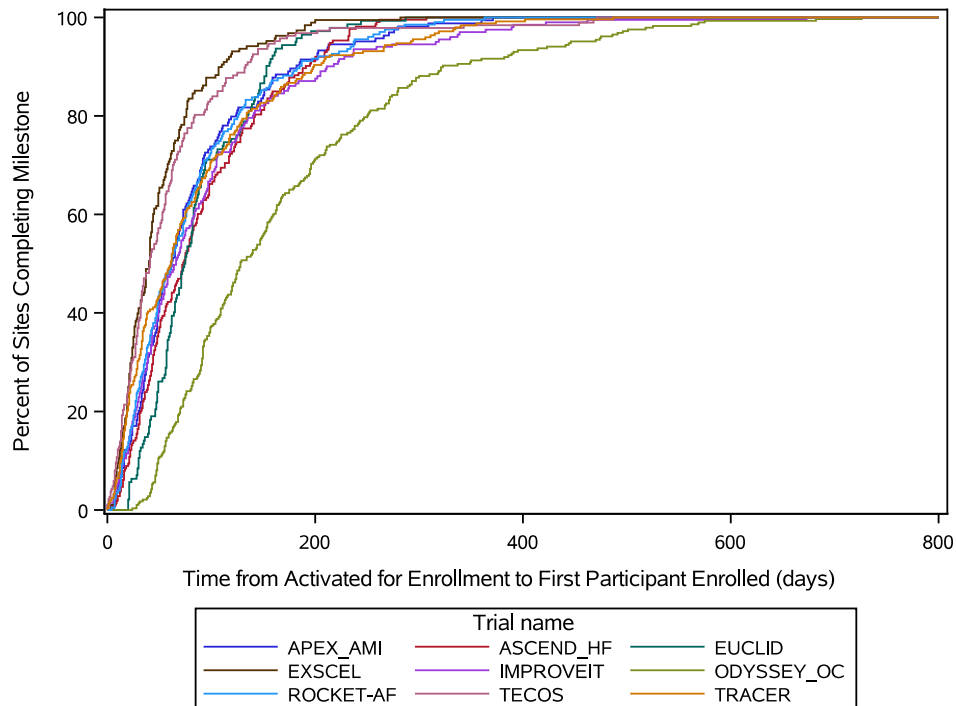

Caption: The time to enrollment of the first participant for each trial represented by the percent of sites completing the milestone at a given time in days.

### eFigure 5. Overall Start-Up Time by Trial

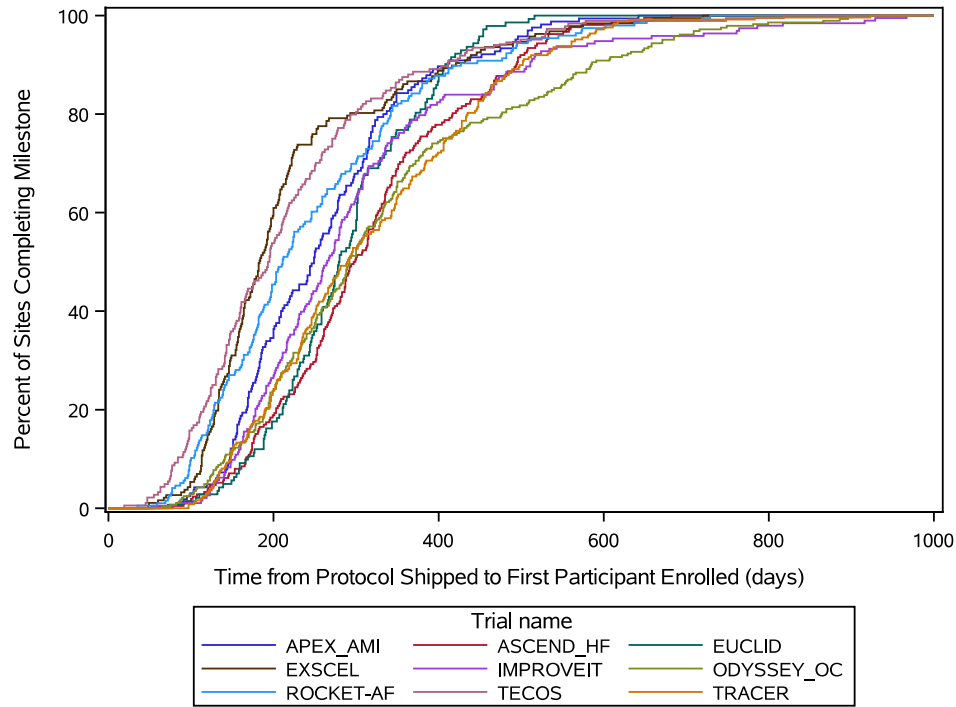

Caption: The overall start-up time for each trial represented by the percent of sites completing the milestone at a given time in days.

## eFigure 6. Side-by-Side Boxplots of Regulatory Approval and Contract Execution by 2004-2007 vs 2008-2012 Trials

Regulatory Approval and Contract Execution by Trial Age

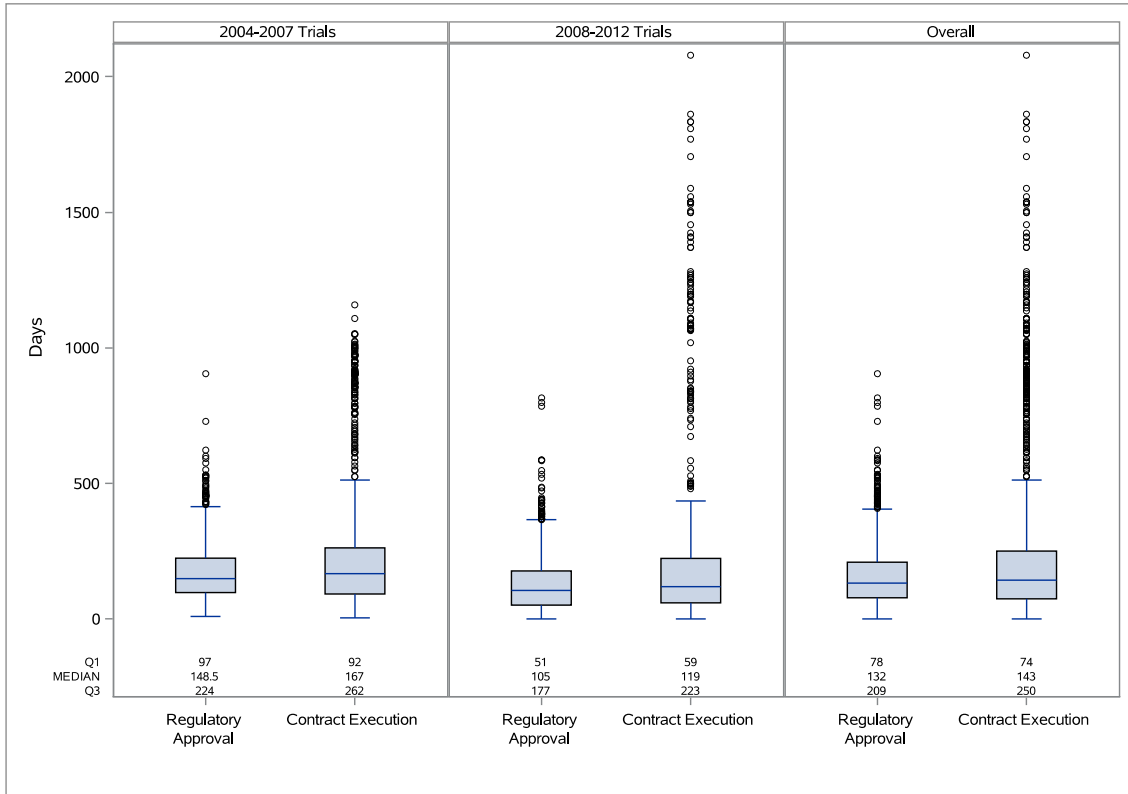

Caption: The boxplots show the days required to reach both regulatory approval and contract execution stratified by early trials from 2004-2007 (APEX-AMI, IMPROVE-IT, ROCKET-AF, ASCEND-AF, & TRACER) and contemporary trials from 2008-2012 (TECOS, EXSCEL, ODYSSEY, & EUCLID).

**eFigure 7.** Side-by-Side Boxplots of Regulatory Approval and Contract Execution by Trial

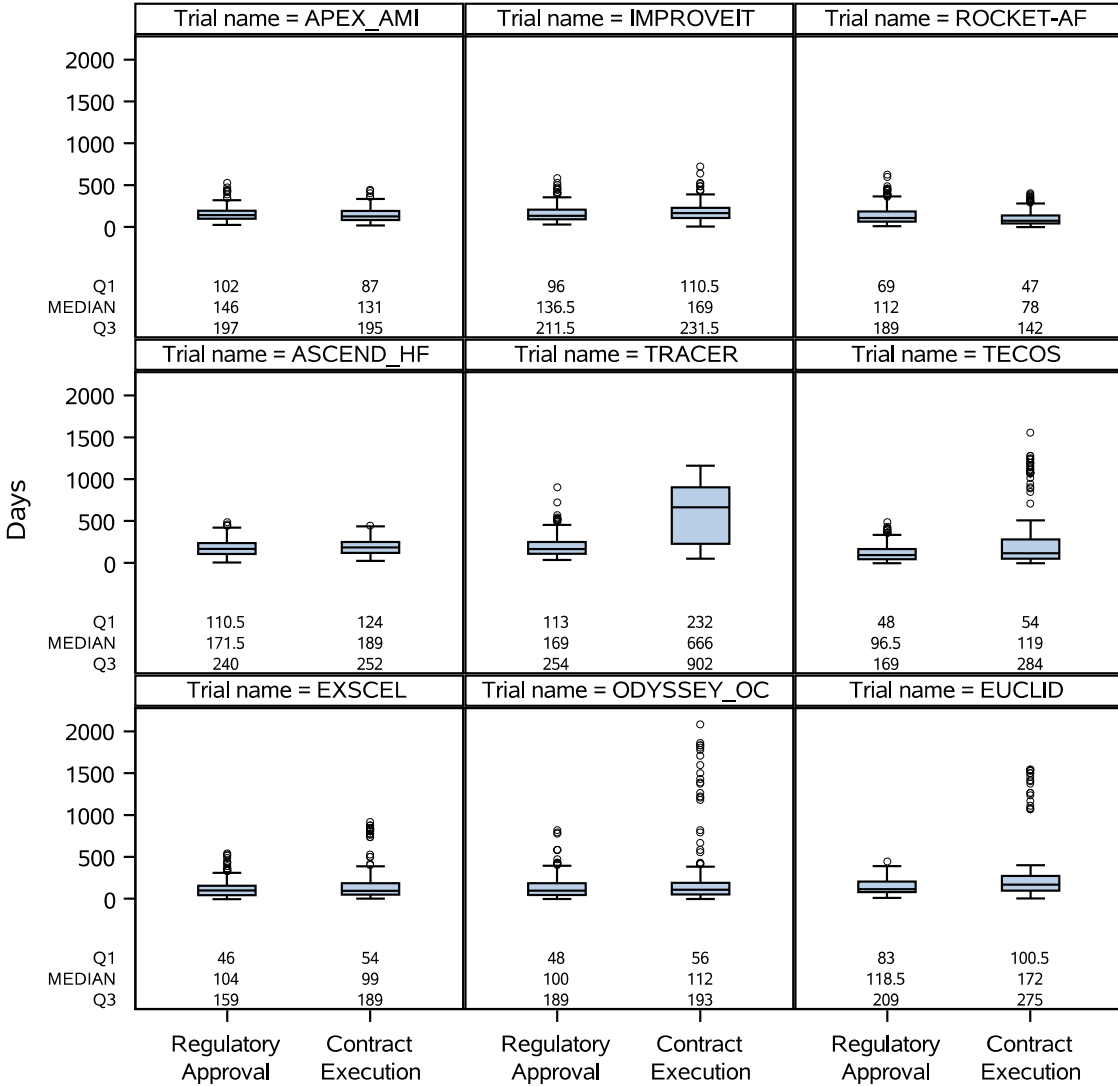

Caption: The boxplots show the days required to reach both regulatory approval and contract execution stratified by individual trial.



**eTable 1.** Milestone Pacing Site Activation

| Milestone                                                                     | All Trials   | 2004-2007*<br>Trials | 2008-2012†<br>Trials | P-value‡ |
|-------------------------------------------------------------------------------|--------------|----------------------|----------------------|----------|
| Contract Complete First, (% of sites)                                         | 49.6%        | 52.0%                | 46.6%                | 0.02     |
| Regulatory Approval first;<br>Subsequent Time to Contract<br>Execution (days) | 46 (13, 155) | 60 (20, 210)         | 33 (8, 111)          | <0.001   |
| Contract Execution first; Subsequent<br>Time to Regulatory Approval (days)    | 30 (12, 63)  | 33 (14, 63)          | 27 (8, 61)           | 0.03     |

Continuous variables are described using median (25<sup>th</sup>, 75<sup>th</sup> percentile). Categorical variables are described using frequency (%). \*2004-2007 trials: APEX-AMI, IMPROVE-IT, ROCKET-AF, ASCEND-AF, & TRACER; †2008-2012 trials: TECOS, EXSCEL, ODYSSEY, & EUCLID; ‡P-value describes difference between 2004-2007 and 2008-2012 trials.

**eTable 2.** Milestone Pacing to Site Activation for Individual Trials

| Trial      | Contract Execution<br>First, (% of sites) | Regulatory Approval First;<br>Subsequent Time to<br>Contract Execution (days) | Contract Execution First;<br>Subsequent Time to<br>Regulatory Approval<br>(days) |
|------------|-------------------------------------------|-------------------------------------------------------------------------------|----------------------------------------------------------------------------------|
| APEX-AMI   | 55.6%                                     | 20 (6, 46)                                                                    | 26 (7, 47)                                                                       |
| IMPROVE-IT | 45.1%                                     | 51 (18, 83)                                                                   | 28 (12, 51)                                                                      |
| ROCKET-AF  | 76.3%                                     | 29 (8, 63)                                                                    | 44 (20, 74)                                                                      |
| ASCEND-HF  | 55.2%                                     | 48 (18, 100)                                                                  | 29 (13, 58)                                                                      |
| TRACER     | 25.2%                                     | 642 (377, 758)                                                                | 40 (15, 84)                                                                      |
| TECOS      | 47.5%                                     | 35 (6, 777)                                                                   | 24 (8, 54)                                                                       |
| EXSCEL     | 49.5%                                     | 34 (5, 99)                                                                    | 30 (9, 71)                                                                       |
| ODYSSEY    | 48.0%                                     | 22 (7, 69)                                                                    | 29 (9, 57)                                                                       |
| EUCLID     | 39.5%                                     | 54 (23, 150)                                                                  | 25 (8, 55)                                                                       |

Continuous variables are described using median (25<sup>th</sup>, 75<sup>th</sup> percentile). Categorical variables are described using frequency (%).

**eTable 3.** Time to Regulatory Approval for Individual Trials by IRB Type

| <b>Trial</b> | <b>IRB Type</b> | <b>Number of Sites, n</b> | <b>Time to Regulatory Approval, days</b> |
|--------------|-----------------|---------------------------|------------------------------------------|
| APEX-AMI     | All sites       | 207                       | 146 (102, 197)                           |
|              | Local           | 207 (100%)                | 146 (102, 197)                           |
| IMPROVE-IT   | All sites       | 252                       | 137 (96, 212)                            |
|              | Local           | 252 (100%)                | 137 (96, 212)                            |
| ROCKET-AF    | All sites       | 283                       | 112 (69, 189)                            |
|              | Central         | 185 (65.4%)               | 84 (56, 130)                             |
|              | Local           | 89 (31.4%)                | 194 (140, 286)                           |
|              | Missing         | 9 (3.2%)                  | 285 (156, 407)                           |
| ASCEND_HF    | All sites       | 280                       | 172 (111, 240)                           |
|              | Central         | 15 (5.4%)                 | 172 (109, 265)                           |
|              | Local           | 90 (32.1%)                | 176 (127, 262)                           |
|              | Missing         | 175 (62.5%)               | 167 (107, 236)                           |
| TRACER       | All sites       | 286                       | 169 (113, 254)                           |
|              | Central         | 58 (20.3%)                | 134 (71, 216)                            |
|              | Local           | 225 (78.6%)               | 183 (121, 258)                           |
|              | Missing         | 3 (1.0%)                  | 192 (90, 301)                            |
| TECOS        | All sites       | 210                       | 97 (48, 169)                             |
|              | Central         | 97 (46.2%)                | 55 (41, 86)                              |
|              | Local           | 94 (44.8%)                | 159 (100, 261)                           |
|              | Missing         | 19 (9.0%)                 | 102 (26, 193)                            |
| EXSCEL       | All sites       | 207                       | 104 (46, 159)                            |
|              | Central         | 145 (70.0%)               | 65 (38, 117)                             |
|              | Local           | 50 (24.2%)                | 194 (145, 332)                           |
|              | Missing         | 12 (5.8%)                 | 132 (62, 220)                            |
| ODYSSEY      | All sites       | 330                       | 100 (48, 189)                            |
|              | Central         | 193 (58.5%)               | 58 (35, 102)                             |
|              | Local           | 137 (41.5%)               | 190 (130, 276)                           |
| EUCLID       | All sites       | 170                       | 119 (83, 209)                            |
|              | Central         | 105 (61.8%)               | 102 (76, 124)                            |
|              | Local           | 65 (38.2%)                | 209 (121, 252)                           |

Continuous variables are described using median (25<sup>th</sup>, 75<sup>th</sup> percentile). Categorical variables are described using frequency (%). IRB = institutional review board.

**eTable 4.** Time to Overall Start-Up for Individual Trials by IRB Type

| <b>Trial</b> | <b>IRB Type</b> | <b>Number of Sites, n</b> | <b>Time to Overall Start-up, days</b> |
|--------------|-----------------|---------------------------|---------------------------------------|
| APEX-AMI     | All sites       | 165                       | 249 (175, 316)                        |
|              | Local           | 165 (100%)                | 249 (175, 316)                        |
| IMPROVE-IT   | All sites       | 193                       | 265 (194, 344)                        |
|              | Local           | 193 (100%)                | 265 (194, 344)                        |
| ROCKET-AF    | All sites       | 196                       | 211 (142, 328)                        |
|              | Central         | 141 (71.9%)               | 181 (125, 246)                        |
|              | Local           | 54 (27.6%)                | 332 (253, 412)                        |
|              | Missing         | 1 (0.5%)                  | 602 (602, 602)                        |
| ASCEND_HF    | All sites       | 212                       | 298 (230, 378)                        |
|              | Central         | 15 (7.1%)                 | 324 (268, 351)                        |
|              | Local           | 89 (42.0%)                | 308 (226, 386)                        |
|              | Missing         | 108 (50.9%)               | 289 (230, 380)                        |
| TRACER       | All sites       | 248                       | 290 (203, 413)                        |
|              | Central         | 52 (21.0%)                | 258 (197, 370)                        |
|              | Local           | 196 (79.0%)               | 299 (207, 423)                        |
| TECOS        | All sites       | 184                       | 194 (128, 273)                        |
|              | Central IRB     | 78 (42.4%)                | 145 (98, 196)                         |
|              | Local IRB       | 92 (50.0%)                | 232 (168, 345)                        |
|              | Missing IRB     | 14 (7.6%)                 | 205 (115, 262)                        |
| EXSCEL       | All sites       | 187                       | 183 (137, 246)                        |
|              | Central IRB     | 137 (73.3%)               | 162 (129, 200)                        |
|              | Local IRB       | 47 (25.1%)                | 264 (207, 439)                        |
|              | Missing IRB     | 3 (1.6%)                  | 222 (215, 451)                        |
| ODYSSEY      | All sites       | 285                       | 292 (203, 405)                        |
|              | Central IRB     | 169 (59.3%)               | 249 (179, 336)                        |
|              | Local IRB       | 116 (40.7%)               | 359 (275, 508)                        |
| EUCLID       | All sites       | 142                       | 280 (223, 343)                        |
|              | Central IRB     | 89 (62.7%)                | 252 (198, 301)                        |
|              | Local IRB       | 53 (37.3%)                | 329 (278, 400)                        |

Continuous variables are described using median (25<sup>th</sup>, 75<sup>th</sup> percentile). Categorical variables are described using frequency (%). IRB = institutional review board.
